# Supplementary material for: Identifying SARS-CoV-2-related coronaviruses in Malayan pangolins
Source: Springer Nature journal article supplement (doi:10.1038/s41586-020-2169-0), 2020-03-26
Supplement: 41586_2020_2169_MOESM2_ESM.pdf [file 41586_2020_2169_MOESM2_ESM.pdf]

## Reporting Summary

Nature Research wishes to improve the reproducibility of the work that we publish. This form provides structure for consistency and transparency in reporting. For further information on Nature Research policies, see [Authors & Referees](#) and the [Editorial Policy Checklist](#).

### Statistics

For all statistical analyses, confirm that the following items are present in the figure legend, table legend, main text, or Methods section.

n/a Confirmed

- The exact sample size ( $n$ ) for each experimental group/condition, given as a discrete number and unit of measurement
- A statement on whether measurements were taken from distinct samples or whether the same sample was measured repeatedly
- The statistical test(s) used AND whether they are one- or two-sided  
*Only common tests should be described solely by name; describe more complex techniques in the Methods section.*
- A description of all covariates tested
- A description of any assumptions or corrections, such as tests of normality and adjustment for multiple comparisons
- A full description of the statistical parameters including central tendency (e.g. means) or other basic estimates (e.g. regression coefficient) AND variation (e.g. standard deviation) or associated estimates of uncertainty (e.g. confidence intervals)
- For null hypothesis testing, the test statistic (e.g.  $F$ ,  $t$ ,  $r$ ) with confidence intervals, effect sizes, degrees of freedom and  $P$  value noted  
*Give  $P$  values as exact values whenever suitable.*
- For Bayesian analysis, information on the choice of priors and Markov chain Monte Carlo settings
- For hierarchical and complex designs, identification of the appropriate level for tests and full reporting of outcomes
- Estimates of effect sizes (e.g. Cohen's  $d$ , Pearson's  $r$ ), indicating how they were calculated

*Our web collection on [statistics for biologists](#) contains articles on many of the points above.*

### Software and code

Policy information about [availability of computer code](#)

Data collection

Reference genome sequence data were downloaded from GenBank, Virological.org and GISAID using the web interface.

Data analysis

Software used: CLC Genomic Workbench v9.0, BLAST v2.3.0+, BWA v0.7.13, MEGAHIT v1.1.3, MAFFT v7.273, PhyML v3.1, Simplot v3.5.1

For manuscripts utilizing custom algorithms or software that are central to the research but not yet described in published literature, software must be made available to editors/reviewers. We strongly encourage code deposition in a community repository (e.g. GitHub). See the Nature Research [guidelines for submitting code & software](#) for further information.

### Data

Policy information about [availability of data](#)

All manuscripts must include a [data availability statement](#). This statement should provide the following information, where applicable:

- Accession codes, unique identifiers, or web links for publicly available datasets
- A list of figures that have associated raw data
- A description of any restrictions on data availability

Data that support the findings of this study have been deposited in GISAID database with accession numbers EPI\_ISL\_410538 - EPI\_ISL\_410544 and to the SRA database under BioProject number PRJNA606875, and are available in the supplementary information file of this paper.

## Field-specific reporting

Please select the one below that is the best fit for your research. If you are not sure, read the appropriate sections before making your selection.

- Life sciences       Behavioural & social sciences       Ecological, evolutionary & environmental sciences

## Life sciences study design

All studies must disclose on these points even when the disclosure is negative.

|                 |                                                                                                                                                                                                                                                                                                                                                                                                                                                                                                                                                                                                                                                 |
|-----------------|-------------------------------------------------------------------------------------------------------------------------------------------------------------------------------------------------------------------------------------------------------------------------------------------------------------------------------------------------------------------------------------------------------------------------------------------------------------------------------------------------------------------------------------------------------------------------------------------------------------------------------------------------|
| Sample size     | We screened all relevant pangolin samples that are available to us in the study period. Among the 43 Guangxi pangolin samples (18 pangolin individuals), 6 samples (5 pangolin individuals) were found with SARS-CoV-2 related coronavirus by sequencing. Among the 5 Guangdong pangolin samples, 1 was found with SARS-CoV-2 related coronavirus by sequencing. All these coronaviruses shared >99.7% genomic similarity to either some of them among themselves or the coronavirus found in previous study. Therefore, such sample size is sufficient for the discovery of SARS-CoV-2 related coronavirus in the pangolins in our conditions. |
| Data exclusions | No data were excluded.                                                                                                                                                                                                                                                                                                                                                                                                                                                                                                                                                                                                                          |
| Replication     | qPCR was also applied on the same sets of samples that have been examined by metatranscriptomic sequencing, as to verify the presence of pangolin coronavirus sequence indicated by sequencing.                                                                                                                                                                                                                                                                                                                                                                                                                                                 |
| Randomization   | There was no separation of experimental groups in the study, hence no randomization.                                                                                                                                                                                                                                                                                                                                                                                                                                                                                                                                                            |
| Blinding        | There was no separation of experimental groups in the study, hence no blinding.                                                                                                                                                                                                                                                                                                                                                                                                                                                                                                                                                                 |

## Reporting for specific materials, systems and methods

We require information from authors about some types of materials, experimental systems and methods used in many studies. Here, indicate whether each material, system or method listed is relevant to your study. If you are not sure if a list item applies to your research, read the appropriate section before selecting a response.

### Materials & experimental systems

| n/a                                 | Included in the study                                           |
|-------------------------------------|-----------------------------------------------------------------|
| <input checked="" type="checkbox"/> | <input type="checkbox"/> Antibodies                             |
| <input type="checkbox"/>            | <input checked="" type="checkbox"/> Eukaryotic cell lines       |
| <input checked="" type="checkbox"/> | <input type="checkbox"/> Palaeontology                          |
| <input type="checkbox"/>            | <input checked="" type="checkbox"/> Animals and other organisms |
| <input checked="" type="checkbox"/> | <input type="checkbox"/> Human research participants            |
| <input checked="" type="checkbox"/> | <input type="checkbox"/> Clinical data                          |

### Methods

| n/a                                 | Included in the study                           |
|-------------------------------------|-------------------------------------------------|
| <input checked="" type="checkbox"/> | <input type="checkbox"/> ChIP-seq               |
| <input checked="" type="checkbox"/> | <input type="checkbox"/> Flow cytometry         |
| <input checked="" type="checkbox"/> | <input type="checkbox"/> MRI-based neuroimaging |

## Eukaryotic cell lines

Policy information about [cell lines](#)

|                                                                   |                                                                                                                                                         |
|-------------------------------------------------------------------|---------------------------------------------------------------------------------------------------------------------------------------------------------|
| Cell line source(s)                                               | Vero E6 cells from ATCC.                                                                                                                                |
| Authentication                                                    | All Vero E6 cells were from ATCC with authentication. The authentication was performed by morphology check under microscopes and growth curve analysis. |
| Mycoplasma contamination                                          | We confirm that all cells were tested as mycoplasma negative.                                                                                           |
| Commonly misidentified lines (See <a href="#">ICLAC</a> register) | No commonly misidentified cell lines were used.                                                                                                         |

## Animals and other organisms

Policy information about [studies involving animals](#); [ARRIVE guidelines](#) recommended for reporting animal research

|                         |                                                                                                                                                                                                                                                                                                                                                       |
|-------------------------|-------------------------------------------------------------------------------------------------------------------------------------------------------------------------------------------------------------------------------------------------------------------------------------------------------------------------------------------------------|
| Laboratory animals      | No laboratory animals were involved in the study.                                                                                                                                                                                                                                                                                                     |
| Wild animals            | Thirty-five (18+12+5) pangolins were seized during routine anti-smuggling operations, and unfortunately dead for unknown reason in the rescue centre. Samples were then collected from them.                                                                                                                                                          |
| Field-collected samples | No field-collected samples were involved in the study.                                                                                                                                                                                                                                                                                                |
| Ethics oversight        | The animals were rescued and treated by the Guangxi Zhuang Autonomous Region Terrestrial Wildlife Medical-aid and Monitoring Epidemic Diseases Research Center under the ethics approval (wild animal treatment regulation No. [2011] 85). The samples were collected following the procedure guideline (Pangolins Rescue Procedure, November, 2016). |

Note that full information on the approval of the study protocol must also be provided in the manuscript.
